# Supplementary material for: Rivaroxaban does not influence hemorrhagic transformation in a diabetes ischemic stroke and endovascular thrombectomy model
Source: PubMed Central journal article supplement (PMC5943582; doi:10.1038/s41598-018-25820-y), 2018-05-09

## Supplementary Information (full-length images)

### **Rivaroxaban does not influence hemorrhagic transformation in a diabetes ischemic stroke and endovascular thrombectomy model**

Feng-Di Liu<sup>a,†</sup>, Rong Zhao<sup>a,†</sup>, Xiao-Yan Feng<sup>b,†</sup>, Yan-Hui Shi<sup>a,†</sup>, Yi-Lan Wu<sup>a</sup>, Xiao-Lei Shen<sup>a</sup>, Ge-Fei Li<sup>a</sup>, Yi-Sheng Liu<sup>a</sup>, Ying Zhao<sup>a</sup>, Xin-Wei He<sup>a</sup>, Jia-Wen Yin<sup>a</sup>, Mei-Ting Zhuang<sup>a</sup>, Bing-Qiao Zhao<sup>c,\*</sup>, Jian-Ren Liu<sup>a,\*</sup>

$\beta$ -actin (2016-4-1)

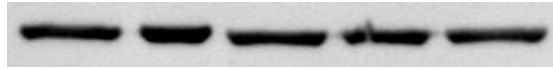

occludin (2016-4-8)

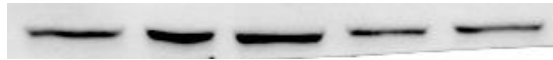

Full-length blots (2016-4-8): HIF & occludin

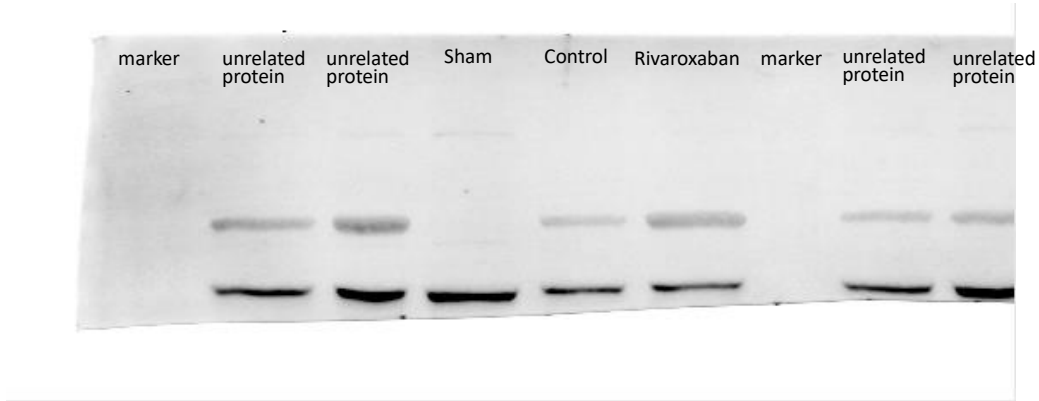

$\beta$ -actin (2016-1-21)

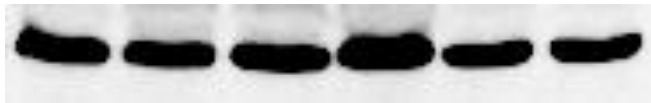

Full-length gel (2016-1-27): MMPs

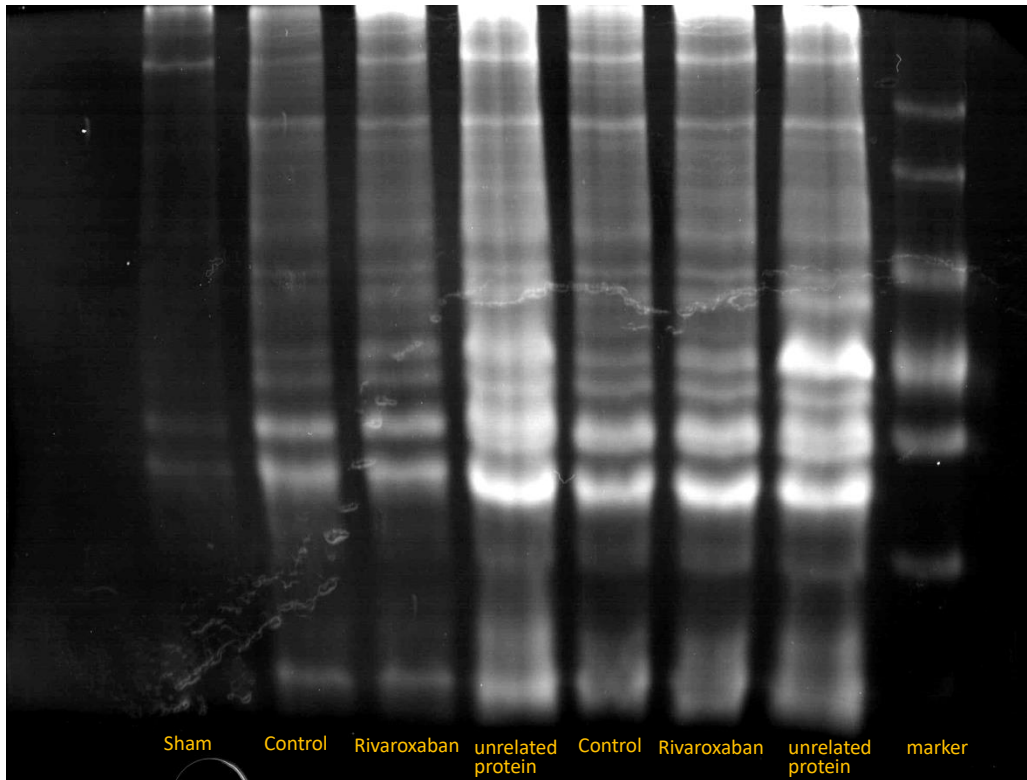

Supplement: 41598_2018_25820_MOESM1_ESM.pdf [file 41598_2018_25820_MOESM1_ESM.pdf]
